1 **The effect of dietary chitin on Atlantic salmon (*Salmo salar*) chitinase activity, gene expression,**  
2 **and microbial composition**

3 Matilde Mengkrog Holen<sup>1</sup>, Simen Rød Sandve<sup>1</sup>, Thomas Nelson Harvey<sup>1</sup>, Yang Jin<sup>1</sup>, Inga Leena  
4 Angell<sup>2</sup>, Knut Rudi<sup>2</sup>, Matthew Peter Kent<sup>1</sup>

5 <sup>1</sup> Centre for Integrative Genetics (CIGENE), Department of Animal and Aquacultural Sciences,  
6 Faculty of Biosciences, Norwegian University of Life Sciences, NO-1432 Ås, Norway

7 <sup>2</sup> Department of Chemistry, Biotechnology and Food Science (IKBM), Norwegian University of Life  
8 Sciences, NO-1432 Ås, Norway

9 **Corresponding author:** Matthew Peter Kent, [matthew.peter.kent@nmbu.no](mailto:matthew.peter.kent@nmbu.no), +4747362026

10 **Running head:** Dietary chitin and salmon gene expression

11 **Keywords:** chitin; chitinase; chitin synthase; chitin metabolism; shrimp shell; black soldier fly

12

13 **ABSTRACT**

14 **Background:** Chitin is a common component in the natural diet of many fish, and a range of chitinases  
15 with the potential to down chitin have been identified. Yet whether chitin is metabolized in fish is still  
16 unclear. Here we used a combination of chitinase activity assay, transcriptomics, and 16S rRNA  
17 bacterial analysis to assess the effect of chitin supplementation on Atlantic salmon gene expression and  
18 microbial community.

19 **Results:** Atlantic salmon express multiple genes associated with chitin metabolism, and we show that  
20 the expression and activity of Atlantic salmon chitinases are not affected by the addition of dietary  
21 chitin. We do, however, demonstrate an association between gut microbial composition, chitinase  
22 activity in the gut, and host chitinase expression.

23 **Conclusion:** The findings presented here support the idea that chitin metabolism genes are linked to  
24 the maintenance of a chitin-based barrier in the teleost gut. These results contribute to a greater  
25 understanding of chitin metabolism in fish.

26

27 **INTRODUCTION**

28 Chitin is a tough and insoluble polymer consisting of  $\beta$ -1,4-linked *N*-acetyl-D-glucosamine (GlcNAc)  
29 residues that serves as a protective and structural component in arthropod exoskeletons such as insects  
30 and crustaceans (Kramer *et al.* 1995; Kurita 2006). This complex carbohydrate is commonly found in  
31 the natural diet of many fish, including Atlantic salmon (*Salmo salar*), and chitinous organisms like

32 Antarctic krill (*Euphausia superba*) and black soldier fly (*Hermetia illucens*) are considered two  
33 sustainable feed sources for Atlantic salmon farming (Hansen *et al.* 2010; Belghit *et al.* 2019).  
34 Supplementation of chitin in Atlantic salmon feed has been shown to promote the growth of potentially  
35 beneficial gut microbes that *in vitro* inhibit the growth of common fish pathogens (Askarian *et al.* 2012).  
36 However, some studies have reported a reduced growth rate in salmon fed chitin-rich diets and it has  
37 been hypothesized that chitin acts as an energy sink when fish are not able to digest and utilize this  
38 polysaccharide properly (Karlsen *et al.* 2017; Renna *et al.* 2017).

39 Chitinase and chitobiase are the enzymes responsible for the hydrolysis of chitin and the production of  
40 GlcNAc monomers. Their activity has been detected in the digestive tract of a variety of fish species  
41 (Jeuniaux 1961; Fänge *et al.* 1979; Lindsay *et al.* 1984; Lindsay 1984; Kono *et al.* 1987; Gutowska *et al.*  
42 *et al.* 2004; Krogdahl *et al.* 2005; Abro *et al.* 2014), including salmonids such as rainbow trout  
43 (*Oncorhynchus mykiss*) (Lindsay *et al.* 1984), and a range of fish chitinases have been identified and  
44 biochemically characterized (Ikeda *et al.* 2009, 2012, 2013, 2017; Zhang *et al.* 2012; Koch *et al.* 2014;  
45 Teng *et al.* 2014; Kakizaki *et al.* 2015; Kawashima *et al.* 2016; Pohls *et al.* 2016; Gao *et al.* 2017). Most  
46 of these enzymes are detected in the gastrointestinal tract and show acid-resistant activities toward  
47 insoluble chitin substrates, indicating that they could have the ability to digest chitin (Ikeda *et al.* 2017).  
48 As far as we know, no one has characterized chitinase proteins in Atlantic salmon.

49 Another family of enzymes involved in chitin metabolism is chitin synthases (CHS), which synthesize  
50 chitin from GlcNAc. Since chitin is present in their scales (Tang *et al.* 2015), it is hypothesized that  
51 salmon express CHS and that these are active, however very little is known about the role of these  
52 enzymes in metabolic processes. In this study we investigated the effect of chitin supplementation on  
53 the expression of host chitinases, chitobiase, and CHS as well as on the microbiome of Atlantic salmon.

54

## 55 MATERIALS AND METHODS

### 56 Feeding trial

57 The fish used in this experiment were Atlantic salmon post-smolts obtained as fry from AquaGen  
58 Breeding Centre, Kyrksæterøra, and reared in fresh water at the Centre for Fish Research, NMBU. The  
59 fish (n = 32) were acclimatized to experimental conditions for 41 days before the trial and were fed a  
60 standard commercial diet. Groups of six fish were placed in each tank with an average weight of  $812 \pm$   
61  $113$  g and diets were tested in two replicate tanks. The fish were fed one of three different diets (Table  
62 1) over 29 days through an automatic feeding system. Starting with a standard core feed composition,  
63 Diet 1 – “control” was supplemented with 6 % cellulose bought from FôrTek, NMBU, Diet 2 – “shrimp  
64 shell” was supplemented with 6 % shrimp (*Pandalus borealis*) shell chitin bought from Primex  
65 (ChitoClear Chitin, Iceland) and in Diet 3, a portion of the fish meal was substituted with insect meal  
66 from defatted black soldier fly larvae (*Hermetica illucens*) obtained from Protix Biosystems BV

67 (Dongen, Netherlands) to a final concentration of approximately 6% chitin. After 29 days fish were  
 68 euthanized by a blow to the head in accordance with the national regulations of animal  
 69 (Dyrevelferdsloven 2015). Tissue samples and the contents from the stomach and pyloric caeca were  
 70 collected separately, flash-frozen in liquid nitrogen, and stored at -80 °C until analysis of gene  
 71 expression and chitinase activity. Contents from the distal intestine (DI), the most distal compartment  
 72 of the gut, were sampled for 16S rRNA sequencing as previously described (Rudi *et al.* 2018).

73

74 **Table 1.** Ingredients and proximal composition of the experimental diets.

|                                        | <i>Experimental diets</i> |                     |                   |
|----------------------------------------|---------------------------|---------------------|-------------------|
|                                        | <i>Control</i>            | <i>Shrimp shell</i> | <i>Fly larvae</i> |
| <i>Ingredients (g kg<sup>-1</sup>)</i> |                           |                     |                   |
| Cellulose                              | <b>4.7</b>                | 0.0                 | 0.0               |
| Fish meal                              | 32.2                      | 32.2                | 9.1               |
| Wheat gluten                           | 9.4                       | 9.4                 | 9.4               |
| Pregel potato starch                   | 8.6                       | 8.6                 | 8.6               |
| Defatted black soldier fly larvae meal | 0.0                       | 0.0                 | <b>32.4</b>       |
| Shrimp shell chitin                    | 0.0                       | <b>4.7</b>          | 0.0               |
| Gelatine                               | 5.8                       | 5.8                 | 5.8               |
| Choline chloride                       | 0.1                       | 0.1                 | 0.1               |
| Fish oil                               | 10.8                      | 10.8                | 6.1               |
| Vitamin/mineral mixture                | 0.5                       | 0.5                 | 0.5               |
| <i>Proximate composition (%)</i>       |                           |                     |                   |
| Ash                                    | 9.17                      | 8.79                | 6.38              |
| Moisture                               | 6.91                      | 6.58                | 4.71              |
| Lipid                                  | 19.64                     | 19.64               | 19.25             |
| Crude protein (N · 6.25)               | 46.9                      | 46.9                | 47.36             |
| Chitin                                 | <b>0</b>                  | <b>6.11</b>         | <b>6.35*</b>      |
| Cellulose                              | 6.11                      | 0                   | 0                 |

75 \* This is a proximate measure using the following formula to calculate chitin in insect meal: chitin (%)  
 76 = ash-free ADF (%) - ADIP (%) as previously done by Marono S. *et al.* (2015) (Marono *et al.* 2015)

77

## 78 RNA-sequencing

79 Total RNA was extracted from the stomach and pyloric caeca tissue samples stored at -80 °C (n = 4 for  
 80 control and fly larvae, n = 5 for shrimp shell) using the RNeasy Plus Universal Kit (QIAGEN). RNA  
 81 quality was assessed using a 2100 Bioanalyzer with the RNA 6000 nano kit (Agilent) and the  
 82 concentration was measured using a Nanodrop 8000 spectrophotometer (Thermo Fisher Scientific).  
 83 Extracted RNA with RNA integrity number (RIN)  $\geq 7$  was used as input for the TruSeq Stranded mRNA  
 84 HT Sample Prep Kit (Illumina) according to the manufacturer's recommendations. Mean library length  
 85 was measured on 2100 Bioanalyzer using the DNA 1000 kit (Agilent) and the library concentration was  
 86 quantified with the Qbit Broad Range kit (Thermo Fisher Scientific). Single-end sequencing (100bp  
 87 reads) was performed at the Norwegian Sequencing Center (Oslo, Norway) using a HiSeq4000  
 88 instrument (Illumina).

89

## 90 **Gene expression**

91 Trimming, mapping, and counting of reads were done using the bcbio-nextgen pipeline  
92 (<https://github.com/bcbio/bcbio-nextgen>). The sequencing reads were aligned to the Atlantic salmon  
93 genome (ICSASG\_v2) (Lien *et al.* 2016) using the STAR aligner with default settings (Dobin *et al.*  
94 2013) after adapter trimming. FeatureCounts was then used to count reads aligned to genes (Liao *et al.*  
95 2014). Raw gene counts were transformed to transcripts per million (TPM) values to normalize for  
96 gene length before comparison of chitinase gene expression levels (Welch's t-test,  $\alpha = 0.05$ ). Gene  
97 expression values were normalized by library size (see TMM normalization in EdgeR user guide  
98 (Robinson and Oshlack 2010)) before differential expression analysis. Based on PCA analysis, two  
99 samples (X8.CFE.7.F4.PC and X9.CFE.13.F1.PC) showed unusual gene expression patterns and were  
100 removed from further analysis of pyloric caeca for fish fed control and fly larvae. All statistical analysis  
101 was done in R (v.3.6.0).

102

## 103 **Differential expression analysis**

104 Lowly expressed genes ( $\log_2(\text{TPM} + 1)$  values  $< 1$ ) were filtered out prior to differential expression  
105 analysis. The analysis was carried out using the standard EdgeR protocol (Robinson *et al.* 2010) where  
106 an exact test of expression values between the experimental diet (shrimp shell or fly larvae) and control  
107 diet gave a  $\log_2$ -fold change, p-value, and false discovery rate (FDR) for each gene. Genes with an FDR  
108  $< 0.05$  and absolute  $\log_2$  fold change ( $\log\text{FC}$ )  $> 0.5$  were defined as differentially expressed.

109

## 110 **Gene enrichment analysis**

111 Gene enrichment analysis of the differential expressed genes was performed using KEGG (Kyoto  
112 Encyclopedia of Genes and Genomes) and GO (Gene Ontology). KEGG analysis was carried out using  
113 the "kegga" function in the limma-package (Ritchie *et al.* 2015) with the argument "species.KEGG =  
114 "sasa"" and p-values  $< 0.05$ . GO analysis was carried out using the package GOstats (Falcon and  
115 Gentleman 2007), following the steps outlined here  
116 (<https://www.bioconductor.org/packages/release/bioc/vignettes/GOstats/inst/doc/GOstatsForUnsupportedOrganisms.pdf>), using the argument "ontology = "BP"" (biological processes) and Bonferroni  
117 adjusted p-values ( $q$ )  $< 0.05$ .

118

## 120 **Chitinase activity test**

121 We measured the chitinase activity of fish analyzed for gene expression that contained stomach and  
122 pyloric caeca content ( $n = 3$ ) as described previously (Ohno *et al.* 2013). Approximately 200 mg of  
123 contents were homogenized using TissueLyser II (QIAGEN) in 900  $\mu\text{L}$  of 50 mM sodium acetate (pH  
124 = 5.5) containing 1X Halt protease inhibitor cocktail (Thermo Fisher Scientific). The samples were

125 centrifuged at 14,000 g for 20 min at 4°C to pellet particulates, and the supernatant was collected for  
126 protein quantification and chitinase activity. Protein concentration was measured using Bradford protein  
127 assay (Quick Start™ Bradford Assay, BioRad) with BSA (Bovine Serum Albumin) used as standard,  
128 according to manufacturer's instructions. Chitinase activity was measured by monitoring the hydrolysis  
129 of 4-Methylumbelliferyl β-D-N,N',N''-triacetylchitotrioside (Sigma-Aldrich, M5639), a fluorogenic  
130 chitin substrate suitable for measuring endochitinase activity, according to the Fluorimetric Chitinase  
131 Assay Kit (Sigma-Aldrich, CS1030) with the following modifications. Briefly, 10 μg of pyloric caeca  
132 proteins and 1 μg of stomach proteins were incubated with 200 μM 4-Methylumbelliferyl β-D-N,N',N''-  
133 triacetylchitotrioside (4-MU-GlcNAc<sub>3</sub>) in McIlvaine's buffer (0.1 M citric acid and 0.2 M Na<sub>2</sub>HPO<sub>4</sub>,  
134 pH 6) in a volume of 100 μL at 28 °C. The pH and temperature were determined from pilot experiments  
135 on a recombinant Atlantic salmon chitinase (rChia.8, unpublished) where pH 6 and 28 °C were optimal  
136 conditions for activity of this enzyme which is expressed in both stomach and pyloric caeca of Atlantic  
137 salmon. The reaction was terminated after 30 min by adding 400 mM sodium carbonate and the  
138 fluorescence of the released 4-Methylumbelliferone (4-MU) was measured at an excitation wavelength  
139 of 360 nm and an emission wavelength of 450 nm using a SpectraMax M2 plate reader (Molecular  
140 Devices) no later than 30 minutes after stopping the reaction. The assay was performed in triplicates  
141 and a 4-MU standard curve was used to quantify 4-MU resulting from the hydrolytic reaction. The  
142 measured fluorescence was corrected for hydrolysis of the substrate without enzyme added. The  
143 chitinase activity was expressed as unit/mg of total protein in the sample where 1 unit is defined as 1  
144 umol of 4-MU formed per minute. Statistical comparisons were done using Student's t-test ( $\alpha = 0.05$   
145 and  $\alpha = 0.1$ ).

146

#### 147 **Illumina sequencing of the 16S rRNA gene**

148 DNA was extracted from ground samples of Diet 1-3 fish feed (n=2 per feed) and the contents collected  
149 from the distal intestine (DI) from all fish (n=12 per feed) using the Mag midi kit (LGC Genomics, UK)  
150 following the manufactures instructions. Preparation of amplicon library using the primer pair  
151 341F/806R (Yu *et al.* 2005) and sequencing was done as previously described (Rudi *et al.* 2018). The  
152 resulting reads were processed as previously described (Angell *et al.* 2020) using a sequence depth of  
153 10,000 sequences per sample.

154

## 155 **RESULTS**

### 156 **Impact of dietary chitin on chitinase activity and expression**

157 We performed an *in vitro* quantification of chitinase activity from crude extracts of total soluble material  
158 collected from the stomach and pyloric caeca of fish fed one of three diets differing in chitin content.  
159 Chitinase activity relative to the amount of protein was consistently much higher (ranging from 5 to 11-

160 fold difference) in the stomach than in pyloric caeca irrespective of diets. Chitinase activity was  
161 unaffected by the inclusion of dietary chitin when compared to control (Student's t-test,  $p > 0.05$ ; Figure  
162 1). However, a trend towards lower activity in fish fed fly larvae compared to the fish fed control and  
163 shrimp shell was observed (Student's t-test,  $p < 0.1$ ).

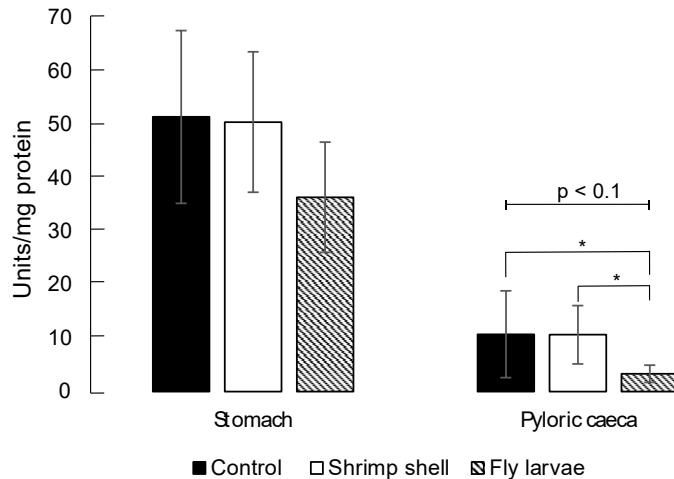

164

165 **Figure 1.** Chitinase activity (units/mg protein) in the stomach- and pyloric caeca contents of fish (n=3)  
166 fed control, shrimp shell, and fly larvae using 4-MU-GlcNAc<sub>3</sub>. Crude soluble protein solutions from  
167 stomach (1 µg per reaction) and pyloric caeca (10 µg per reaction) was incubated with 200 µM 4-MU-  
168 GlcNAc<sub>3</sub> for 30 minutes at 28 °C in McIlvaine's buffer, pH 6. 1 unit is defined as 1 µmol of 4-MU  
169 formed per minute. The values shown are means of triplicates ± SD.

170

171 According to the NCBI *Salmo Salar* RefSeq annotation (GCF\_000233375.1; release 100), Atlantic  
172 salmon codes for 10 chitinase-like genes from the glycosyl hydrolase family 18 (hereafter named  
173 *chia.1-10*; see Supplementary Table 1 for the corresponding gene IDs), a single chitobiase-like gene  
174 from the glycosyl hydrolase family 18 (hereafter named *ctbs*), and four genes with putative chitin-  
175 synthase domains (hereafter named *chs1a*, *chs1b*, *chs2*, and *chs3*). Eight chitinase genes and two CHS  
176 genes showed tissue-specific expression (stomach; *chia.3*, *4*, *5* and *7*, pyloric caeca; *chia.1*, *2*, *6*, *9* and  
177 *10*, *chs1a* and *chs1b*) with *chia.8* and *ctbs* being ubiquitously expressed in both tissues (Figure 2A).  
178 Notably, three of the chitinase genes expressed in the stomach (*chia.3*, *4*, and *7*) were among the most  
179 abundant transcripts present in the tissue, whereas *chia.1*, *chia.2*, and *chia.6* were among the most  
180 abundant transcripts in pyloric caeca. Two CHS genes, *chs2* and *chs3* were not expressed in any of the  
181 two tissues. To assess the response of chitinase-, chitobiase- and CHS genes to the inclusion of dietary  
182 chitin, we compared their expression levels in the stomach (Figure 2B) and pyloric caeca (Figure 2C).  
183 One chitinase, *chia.5*, was lowly expressed ( $\log_2(\text{TPM}) < 2$ ) and is therefore not shown in Figure 2B.  
184 The inclusion of dietary chitin had no significant effect on chitinase, chitobiase, and CHS gene  
185 expression (Welch's t-test,  $p > 0.05$ ), although the expression of *chia.1*, *chia.2*, and *chia.6* in pyloric  
186 caeca appeared to be slightly lower in fish fed fly larvae ( $p < 0.13$ ).



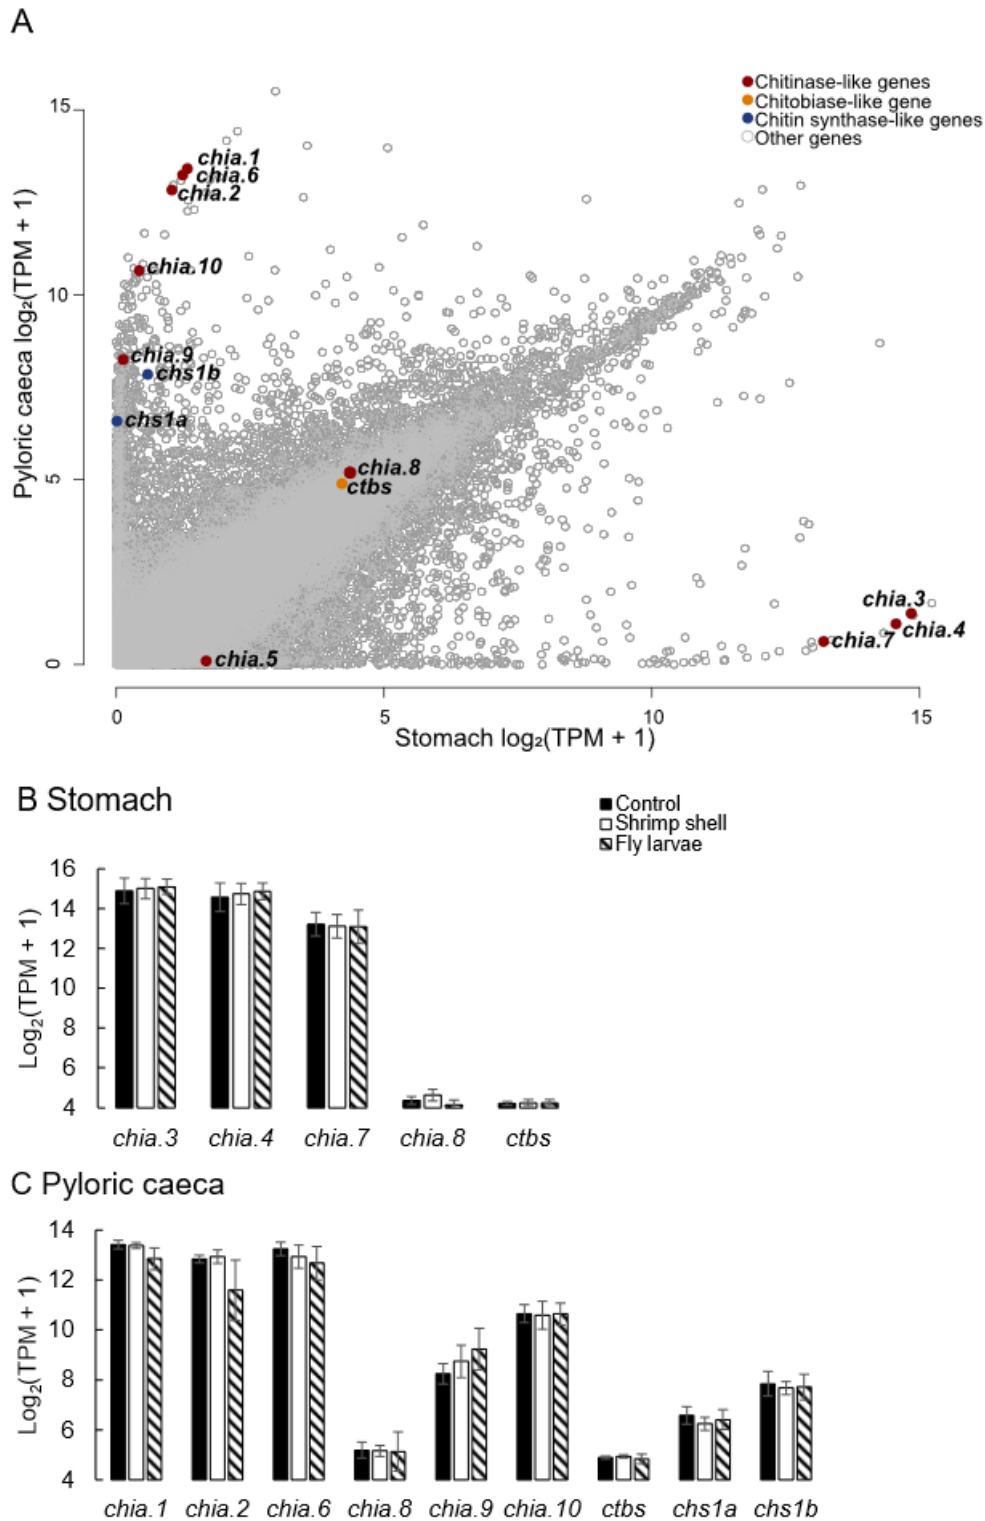

187

188 **Figure 2.** A) Gene expression levels ( $\log_2(\text{TPM} + 1)$ ) of chitinase-, chitobiase- and CHS genes compared  
 189 to the expression levels of all genes in the stomach and pyloric caeca for fish fed the control diet ( $n=4$   
 190 for stomach and  $n=3$  for pyloric caeca). B) Gene expression levels ( $\log_2(\text{TPM} + 1)$ ) of chitinase and  
 191 chitobiase genes in the stomach ( $n=4$  for control and fly larvae,  $n=5$  for shrimp shell). C) Gene  
 192 expression levels ( $\log_2(\text{TPM} + 1)$ ) of chitinase and CHS genes in pyloric caeca ( $n=3$  for control and fly  
 193 larvae,  $n=5$  for shrimp shell). Please note that the y-axis does not extend to 0.

194

## 195 Gene enrichment analysis

196 In addition to focusing on genes related to chitin metabolism, we examined how the transcriptome more  
197 generally responded to the inclusion of dietary chitin as a replacement to cellulose. Beginning with the  
198 stomach, feeding fish a diet including fly larvae had very little effect on the transcriptome compared to  
199 the control diet with only one differentially expressed gene (DEG), namely dual-specificity protein  
200 phosphatase 1-like (*dusp1*). In contrast, a shrimp shell containing diet provoked a larger effect with 889  
201 upregulated and 570 downregulated genes. The most enriched GO (biological process) and KEGG  
202 terms among the upregulated genes were processes and pathways involved in cell organization  
203 including muscle structure development, focal adhesion, and extracellular matrix (ECM) receptor  
204 interactions (Table 2).

205

206 **Table 2.** Top GO terms and KEGG pathways of upregulated (up) and downregulated (down) DEGs in  
207 the stomach of fish fed shrimp shells. The rich factor is the ratio of DEG number and the total number  
208 of genes annotated to this pathway.

| Enriched term                                | DEGs | Rich factor | P-value  | Method | Mode |
|----------------------------------------------|------|-------------|----------|--------|------|
| Muscle structure development                 | 184  | 0.108       | 7.69E-35 | GO_BP  | Up   |
| Anatomical structure morphogenesis           | 396  | 0.063       | 3.18E-27 | GO_BP  | Up   |
| Cell adhesion                                | 189  | 0.087       | 5.58E-25 | GO_BP  | Up   |
| Focal adhesion                               | 41   | 0.064       | 1.25E-12 | KEGG   | Up   |
| ECM-receptor interaction                     | 19   | 0.067       | 8.75E-07 | KEGG   | Up   |
| Regulation of actin cytoskeleton             | 30   | 0.048       | 9.88E-07 | KEGG   | Up   |
| Synaptic vesicle recycling                   | 19   | 0.116       | 2.91E-05 | GO_BP  | Down |
| Glycoprotein biosynthetic process            | 38   | 0.066       | 3.29E-05 | GO_BP  | Down |
| Protein glycosylation                        | 30   | 0.071       | 5.77E-05 | GO_BP  | Down |
| UDP-N-acetylglucosamine biosynthetic process | 5    | 0.42        | 3.45E-04 | GO_BP  | Down |
| Metabolic pathways                           | 80   | 0.025       | 4.59E-10 | KEGG   | Down |
| Amino sugar and nucleotide sugar metabolism  | 11   | 0.085       | 1.20E-06 | KEGG   | Down |
| Glutathione metabolism                       | 9    | 0.084       | 1.20E-05 | KEGG   | Down |
| Mucin type O-glycan biosynthesis             | 8    | 0.09        | 2.28E-05 | KEGG   | Down |

209

210 Among the downregulated genes in the stomach, the most enriched processes and pathways were those  
211 where glycosylation plays a central role, including synaptic vesicle recycling, glycoprotein biosynthetic  
212 processes, and amino sugar and nucleotide sugar metabolism. Notably, several of the downregulated  
213 genes are central in the pathway whereby fructose-6-phosphate is converted to uridine diphosphate N-  
214 acetylglucosamine (UDP-N-acetylglucosamine biosynthetic process), the substrate molecule used by  
215 CHS to synthesize chitin (Figure 3). This includes glutamine-fructose-6-phosphate aminotransferase 2-



216 like (*gfpt2*), glucosamine-phosphate N-acetyltransferase 1 (*gnpnat1*) and UDP-N-acetylhexosamine  
217 pyrophosphorylase-like (*uap1*).  
218

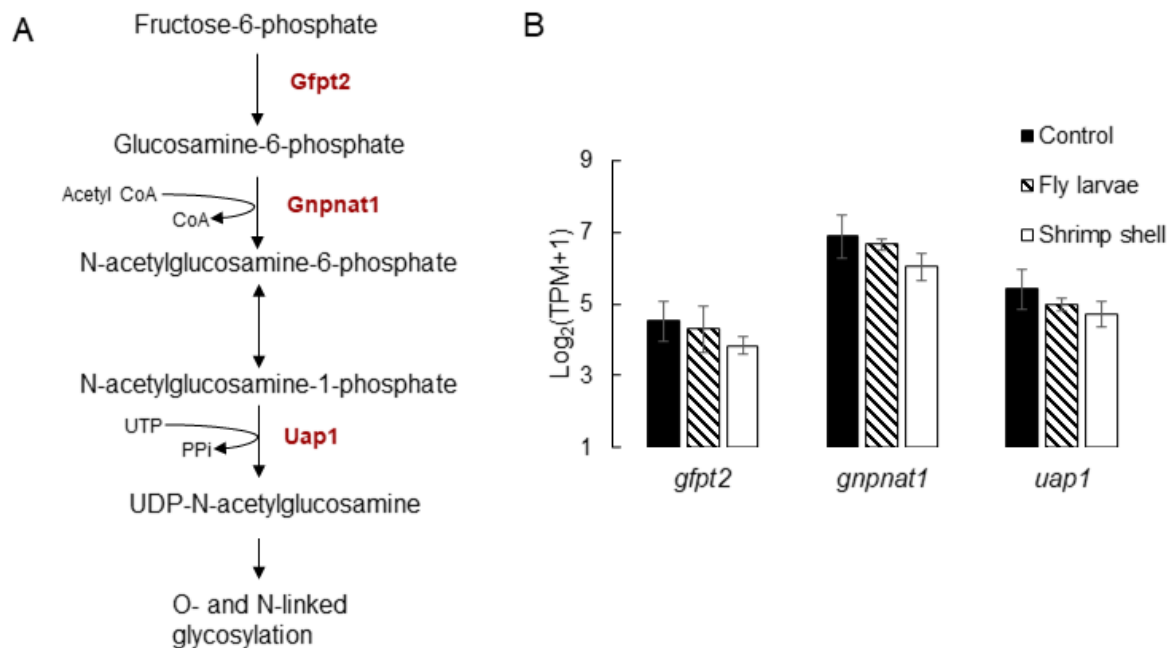

219

220 **Figure 3.** A) The hexosamine biosynthetic pathway leading to the production of UDP-N-  
221 acetylglucosamine (UDP-GlcNAc) where central enzymes discussed in the text are marked in red. B)   
222 Gene expression levels ( $\log_2(\text{TPM} + 1)$ ) of differentially expressed hexosamine biosynthetic pathway   
223 genes in the stomach (n=4 for control and fly larvae, n=5 for shrimp shell). Please note that the y-axis   
224 does not extend to 0.

225

226 When analyzing data from the pyloric caeca only two genes (endonuclease domain-containing 1  
227 protein-like; *endd1*, and ribonuclease P protein subunit p30-like; *rpp30*) were differentially expressed  
228 when replacing cellulose with shrimp shell chitin, whereas 53 genes were upregulated and eight  
229 downregulated in response to feeding fly larvae. GO enrichment of the 53 upregulated genes revealed  
230 that many of these genes (n=22) are involved in the biosynthesis of cholesterol including HMG-CoA  
231 reductase (*hmgr*) which is responsible for the rate-limiting step in the cholesterol biosynthesis pathway.  
232 No common enriched term was found for the downregulated genes, but the 8 genes detected included  
233 acid-sensing (proton gated) ion channel 1 (*asic1*), collagen alpha-1(XXIV) chain-like (*col24a1*), solute  
234 carrier family 25 member 48-like (*slc25a48*), peptidase inhibitor R3HDML-like (*r3hdml*), lecithin  
235 retinol acyltransferase-like (*lrat*) and three uncharacterized genes.

236

## 237 The bacterial composition of distal intestine contents

238 To investigate the impact of dietary chitin on the microbial community, we analyzed the bacterial  
239 metapopulation of feed and DI using 16S rRNA gene sequencing. We observed a clear relationship  
240 whereby bacteria present in the raw feedstuff were also present in the DI (Figure 4). The microbial  
241 profiles of DI contents from fish fed control and shrimp shell diets were almost identical, at the genus  
242 level the taxa dominating the distal intestinal contents of fish fed control and shrimp shell were  
243 *Lactobacillus* (45.7% and 50.7%), *Streptococcus* (9.4% and 9.3%) and *Weissella* (6.4% and 6.5%). For  
244 fish fed fly larvae, the dominant taxa were *Actinomyces* (28.2%), *Bacillus* (21.6%), and *Enterococcus*  
245 (16.9%). All prevalent taxa in distal intestinal contents were also present in the feed samples, although  
246 the relative amount of *Actinomyces* in fish fed fly larvae was substantially higher than in the feed (28.2%  
247 vs 2.18%).

248

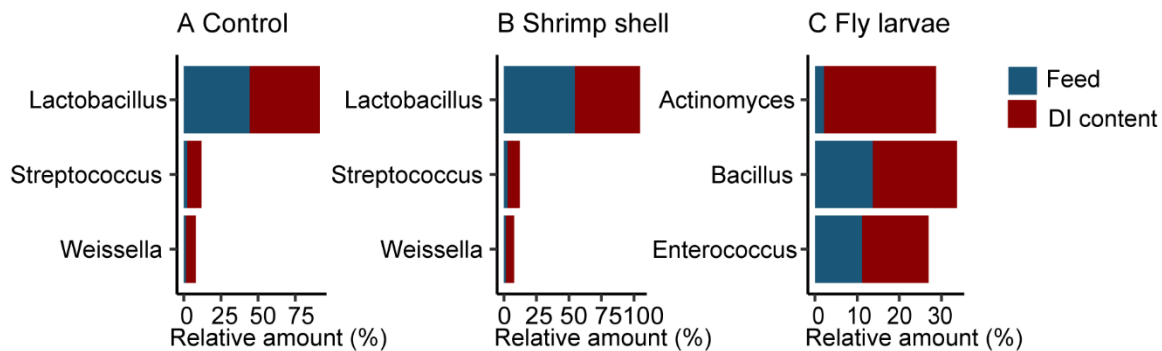

249

250 **Figure 4.** The three most abundant bacteria found in distal intestine (DI content) and fish feed as  
251 assessed by 16S rRNA gene sequencing of fish fed A. Control diet (mean value of n=11 for DI  
252 content and n=2 for feed), B. Shrimp shell diet (mean value of n=9 for DI content and n=2 for feed),  
253 and C. Fly larvae diet (mean value of n=10 for DI content and n=2 for feed).

254

## 255 DISCUSSION

256 Transcriptome analyses revealed that the stomach and pyloric caeca react differently to the diets given  
257 in this trial. The largest changes in terms of DEGs were observed in the stomach when fish were fed a  
258 diet supplemented with chitin from shrimp shells. GO and KEGG analysis lead us to conclude that these  
259 changes involve the upregulation of genes involved in tissue organization and extracellular matrix-cell  
260 interactions and are linked to structural changes in the gastric tissue. The mucosal barrier that covers  
261 the gastrointestinal tract of Atlantic salmon consists of highly glycosylated mucins (Jin *et al.* 2015) and  
262 the downregulation of genes involved in glycosylation of these proteins further implies a structural  
263 change or a response to the extracellular environment. We hypothesize that this change is partly caused  
264 by chitin degradation, with the release of products such as GlcNAc as the result of the activity of highly  
265 expressed chitinases in the stomach (Figure 2A-B). In line with what we observe, higher GlcNAc  
266 concentrations are associated with the downregulation of genes involved in the biosynthesis of UDP-  
267 GlcNAc (Figure 3). UDP-GlcNAc is a substrate required for O – and N-glycosylation of proteins,

268 including mucins that are heavily glycosylated. In mice, orally administered GlcNAc was shown to  
269 enter the hexosamine biosynthetic pathway and increase the abundance of UDP-GlcNAc (Ryczko *et al.*  
270 2016). UDP-GlcNAc has shown to act as an end-product inhibitor of this pathway (Chiaradonna *et al.*  
271 2018) and regulates the gene expression of *gfpt2*, which converts fructose-6-phosphate and glutamine  
272 to glucosamine-6-phosphate and glutamate, eventually modulating glycosylation homeostasis.

273 There is evidence for the presence of chitinous structures surrounding the mucosal barrier of ray-finned  
274 fish (Tang *et al.* 2015; Nakashima *et al.* 2018) and the results presented here are consistent with the  
275 evolutionary conservation of host chitinases and chitobiase to participate in the remodeling of these  
276 structures. Previous studies show that Atlantic salmon is not able to utilize chitin to a significant extent  
277 (Olsen *et al.* 2006). In line with our results, increasing the dietary chitin content has previously been  
278 shown not to correlate with increased chitinase activity in fish (Lindsay *et al.* 1984; Kono *et al.* 1987;  
279 Abro *et al.* 2014), and it seems as if the chitinase activity is always present independent of dietary chitin.  
280 There could be two possible reasons for this: 1) gut chitinase activity is not regulated by the addition of  
281 chitin because Atlantic salmon is exposed to a relatively constant supply of chitin during its life cycle,  
282 and/or 2) the chitinase and chitobiase genes are constitutively expressed because of their role as chitin  
283 remodelers in the intestinal mucosa. Relatively high CHS gene expression levels in the same intestinal  
284 segments of Atlantic salmon as chitinases and chitobiase genes are expressed favor the second  
285 hypothesis.

286 Compared to stomach, few DEGs were detected in pyloric caeca with the greatest changes observed in  
287 fish fed fly larvae; this included the significant upregulation of cholesterol biosynthetic genes. Such an  
288 upregulation could be expected as a response to lower cholesterol levels in the feed, as insect lipids  
289 usually contain low cholesterol levels, but a substantial amount of phytol sterol (Secci *et al.* 2018). This  
290 has previously been shown to induce the cholesterol biosynthetic pathway in the pyloric caeca of  
291 Atlantic salmon (Jin *et al.* 2018).

292 Chitinase activity in the stomach and pyloric caeca contents of Atlantic salmon did not seem to be  
293 significantly affected by the addition of dietary chitin, but fish fed fly larvae had slightly lower chitinase  
294 activity in pyloric caeca contents than fish fed control and shrimp shell diets (Figure 1). This is in line  
295 with the slight decrease in gene expression levels of three chitinase genes of fish fed fly larvae; *chia.1*,  
296 *chia.2*, and *chia.6*, all being exclusively expressed in pyloric caeca (Figure 2C). In general, the  
297 transcriptome of Atlantic salmon did not seem to respond strongly to changing the standard commercial  
298 diet with fly larvae diet, but the bacterial composition of fish fed fly larvae was different from the  
299 composition of fish fed control and shrimp shell diets (Figure 4). In accord with our findings, an increase  
300 in the relative abundance of *Actinomyces*, *Bacillus*, and *Enterococcus* when Atlantic salmon is fed fly  
301 larvae have previously been reported (Li *et al.* 2021). Since *Actinomyces* and *Bacillus* are potential  
302 chitin degraders (Askarian *et al.* 2012; Beier and Bertilsson 2013; Wang *et al.* 2018), we hypothesize

303 that the observed decrease in Atlantic salmon chitinase gene expression levels and activity under fly  
304 larvae diet is an effect of the activity of bacterial chitinases, reducing the level of dietary and host-  
305 derived chitin available as a substrate to endogenous chitinases in the gastrointestinal tract.

306

## 307 **CONCLUSION**

308 We show that the stomach and pyloric caeca transcriptome of Atlantic salmon did not respond to a great  
309 extent to the presence of dietary chitin, in support of the idea that evolutionary conservation of host  
310 chitinases is mostly linked to remodeling of chitin as a structural element in the gut lining (Nakashima  
311 *et al.* 2018). Furthermore, we demonstrate an association between gut microbial composition, chitin  
312 activity in the gut, and host chitinase gene expression, and hypothesize functional interconnection  
313 between chitinase-secreting gut bacteria (e.g. *Actinomyces*) and chitinase gene regulation in the host.  
314 These results contribute to a greater understanding of chitin metabolism in fish in general.

315

## 316 **DATA AVAILABILITY STATEMENT**

317 Raw RNA-seq data are available on ArrayExpress with the accession number E-MTAB-10594. The  
318 raw 16S sequence data are available at NCBI's Sequence Read Archive (SRA) with accession number  
319 PRJNA820557.

320

## 321 **WELFARE STATEMENT**

322 The experiment was conducted in accordance with Norwegian and European regulations related to  
323 animal research. Formal approval of the experiment by the Norwegian Animal Research Authority  
324 (NARA) was not required as the experimental conditions were following routine practices at the Centre  
325 for Fish Research at NMBU and no compromised welfare was expected.

326

## 327 **ACKNOWLEDGEMENTS**

328 We want to acknowledge Protix Biosystems BV for providing us with insect meal from defatted black  
329 soldier fly larvae (*Hermetica illucens*) and Dr. Jon Øvrum Hansen for helping with feed composition  
330 calculations and feed pellet processing.

331

332 **REFERENCES**

- 333 Abro, R., K. Sundell, E. Sandblom, H. Sundh, E. Brännäs *et al.*, 2014 Evaluation of chitinolytic  
334 activities and membrane integrity in gut tissues of Arctic charr (*Salvelinus alpinus*) fed fish meal  
335 and zygomycete biomass. *Comp Biochem Physiol B, Biochem Mol Biol* 175: 1–8.
- 336 Angell, I. L., L. Bergaust, J. F. Hanssen, E. M. Aasen, and K. Rudi, 2020 Ecological Processes  
337 Affecting Long-Term Eukaryote and Prokaryote Biofilm Persistence in Nitrogen Removal from  
338 Sewage. *Genes (Basel)* 11:.
- 339 Askarian, F., Z. Zhou, R. E. Olsen, S. Sperstad, and E. Ringø, 2012 Culturable autochthonous gut  
340 bacteria in Atlantic salmon (*Salmo salar* L.) fed diets with or without chitin. Characterization by  
341 16S rRNA gene sequencing, ability to produce enzymes and in vitro growth inhibition of four fish  
342 pathogens. *Aquaculture* 326–329: 1–8.
- 343 Beier, S., and S. Bertilsson, 2013 Bacterial chitin degradation-mechanisms and ecophysiological  
344 strategies. *Front. Microbiol.* 4: 149.
- 345 Belghit, I., N. S. Liland, P. Gjesdal, I. Biancarosa, E. Menchetti *et al.*, 2019 Black soldier fly larvae  
346 meal can replace fish meal in diets of sea-water phase Atlantic salmon (*Salmo salar*). *Aquaculture*  
347 503: 609–619.
- 348 Chiaradonna, F., F. Ricciardiello, and R. Palorini, 2018 The Nutrient-Sensing Hexosamine  
349 Biosynthetic Pathway as the Hub of Cancer Metabolic Rewiring. *Cells* 7:.
- 350 Dobin, A., C. A. Davis, F. Schlesinger, J. Drenkow, C. Zaleski *et al.*, 2013 STAR: ultrafast universal  
351 RNA-seq aligner. *Bioinformatics* 29: 15–21.
- 352 Dyrevelferdsloven, 2015 *Forskrift om bruk av dyr i forsøk, § 16*.
- 353 Falcon, S., and R. Gentleman, 2007 Using GOSTats to test gene lists for GO term association.  
354 *Bioinformatics* 23: 257–258.
- 355 Fänge, R., G. Lundblad, J. Lind, and K. Slettengren, 1979 Chitinolytic enzymes in the digestive  
356 system of marine fishes. *Mar. Biol.* 53: 317–321.
- 357 Gao, C., X. Cai, Y. Zhang, B. Su, H. Song *et al.*, 2017 Characterization and expression analysis of  
358 chitinase genes (CHIT1, CHIT2 and CHIT3) in turbot (*Scophthalmus maximus* L.) following  
359 bacterial challenge. *Fish Shellfish Immunol.* 64: 357–366.
- 360 Gutowska, M. A., J. C. Drazen, and B. H. Robison, 2004 Digestive chitinolytic activity in marine  
361 fishes of Monterey Bay, California. *Comp Biochem Physiol, Part A Mol Integr Physiol* 139: 351–  
362 358.
- 363 Hansen, J. Ø., M. Penn, M. Øverland, K. D. Shearer, Å. Krogdahl *et al.*, 2010 High inclusion of  
364 partially deshelled and whole krill meals in diets for Atlantic salmon (*Salmo salar*). *Aquaculture*  
365 310: 164–172.
- 366 Ikeda, M., H. Kakizaki, and M. Matsumiya, 2017 Biochemistry of fish stomach chitinase. *Int. J. Biol.*  
367 *Macromol.* 104: 1672–1681.
- 368 Ikeda, M., Y. Kondo, and M. Matsumiya, 2013 Purification, characterization, and molecular cloning  
369 of chitinases from the stomach of the threeline grunt *Parapristipoma trilineatum*. *Process*  
370 *Biochemistry* 48: 1324–1334.

- 371 Ikeda, M., K. Miyauchi, and M. Matsumiya, 2012 Purification and characterization of a 56 kDa  
372 chitinase isozyme (PaChiB) from the stomach of the silver croaker, *Pennahia argentatus*. *Biosci.*  
373 *Biotechnol. Biochem.* 76: 971–979.
- 374 Ikeda, M., K. Miyauchi, A. Mochizuki, and M. Matsumiya, 2009 Purification and characterization of  
375 chitinase from the stomach of silver croaker *Pennahia argentatus*. *Protein Expr. Purif.* 65: 214–222.
- 376 Jeuniaux, C., 1961 Chitinase: an addition to the list of hydrolases in the digestive tract of vertebrates.  
377 *Nature* 192: 135–6.
- 378 Jin, Y., R. E. Olsen, G. B. Gillard, M.-A. Østensen, S. A. Korsvoll *et al.*, 2018 A systemic study of  
379 lipid metabolism regulation in salmon fingerlings and early juveniles fed plant oil. *Br. J. Nutr.* 120:  
380 653–664.
- 381 Jin, C., J. T. Padra, K. Sundell, H. Sundh, N. G. Karlsson *et al.*, 2015 Atlantic Salmon Carries a  
382 Range of Novel O-Glycan Structures Differentially Localized on Skin and Intestinal Mucins. *J.*  
383 *Proteome Res.* 14: 3239–3251.
- 384 Kakizaki, H., M. Ikeda, H. Fukushima, and M. Matsumiya, 2015 Distribution of Chitinolytic  
385 Enzymes in the Organs and cDNA Cloning of Chitinase Isozymes from the Stomach of Two  
386 Species of Fish, Chub Mackerel (*Scomber japonicus*) and Silver Croaker (*Pennahia argentata*).  
387 *OJMS* 05: 398–411.
- 388 Karlsen, Ø., H. Amlund, A. Berg, and R. E. Olsen, 2017 The effect of dietary chitin on growth and  
389 nutrient digestibility in farmed Atlantic cod, Atlantic salmon and Atlantic halibut. *Aquac. Res.* 48:  
390 123–133.
- 391 Kawashima, S., H. Ikehata, C. Tada, T. Ogino, H. Kakizaki *et al.*, 2016 Stomach Chitinase from  
392 Japanese Sardine *Sardinops melanostictus*: Purification, Characterization, and Molecular Cloning  
393 of Chitinase Isozymes with a Long Linker. *Mar. Drugs* 14: 22.
- 394 Koch, B. E. V., J. Stougaard, and H. P. Spaink, 2014 Spatial and temporal expression patterns of  
395 chitinase genes in developing zebrafish embryos. *Gene Expr. Patterns* 14: 69–77.
- 396 Kono, M., T. Matsui, and C. Shimizu, 1987 Effect of chitin, chitosan, and cellulose as diet  
397 supplements on the growth of cultured fish. *NSUGAF* 53: 125–129.
- 398 Kramer, K. J., T. L. Hopkins, and J. Schaefer, 1995 Applications of solids NMR to the analysis of  
399 insect sclerotized structures. *Insect Biochem. Mol. Biol.* 25: 1067–1080.
- 400 Krogdahl, A., G. I. Hemre, and T. P. Mommsen, 2005 Carbohydrates in fish nutrition: digestion and  
401 absorption in postlarval stages. *Aquac. Nutr.* 11: 103–122.
- 402 Kurita, K., 2006 Chitin and chitosan: functional biopolymers from marine crustaceans. *Mar.*  
403 *Biotechnol.* 8: 203–226.
- 404 Li, Y., L. Bruni, A. Jaramillo-Torres, K. Gajardo, T. M. Kortner *et al.*, 2021 Differential response of  
405 digesta- and mucosa-associated intestinal microbiota to dietary insect meal during the seawater  
406 phase of Atlantic salmon. *Anim Microbiome* 3: 8.
- 407 Liao, Y., G. K. Smyth, and W. Shi, 2014 featureCounts: an efficient general purpose program for  
408 assigning sequence reads to genomic features. *Bioinformatics* 30: 923–930.
- 409 Lien, S., B. F. Koop, S. R. Sandve, J. R. Miller, M. P. Kent *et al.*, 2016 The Atlantic salmon genome  
410 provides insights into rediploidization. *Nature* 533: 200–205.



- 411 Lindsay, G. J. H., M. J. Walton, J. W. Adron, T. C. Fletcher, C. Y. Cho *et al.*, 1984 The growth of  
412 rainbow trout (*Salmo gairdneri*) given diets containing chitin and its relationship to chitinolytic  
413 enzymes and chitin digestibility. *Aquaculture* 37: 315–334.
- 414 Lindsay, G. J. H., 1984 Distribution and function of digestive tract chitinolytic enzymes in fish. *J.*  
415 *Fish Biol.* 24: 529–536.
- 416 Marono, S., G. Piccolo, R. Loponte, C. Di Meo, Y. A. Attia *et al.*, 2015 In vitro crude protein  
417 digestibility of *Tenebrio molitor* and *Hermetia illucens* insect meals and its correlation with  
418 chemical composition traits. *Ital. J. Anim. Sci.* 14:.
- 419 Nakashima, K., S. Kimura, Y. Ogawa, S. Watanabe, S. Soma *et al.*, 2018 Chitin-based barrier  
420 immunity and its loss predated mucus-colonization by indigenous gut microbiota. *Nat. Commun.* 9:  
421 3402.
- 422 Ohno, M., Y. Togashi, K. Tsuda, K. Okawa, M. Kamaya *et al.*, 2013 Quantification of Chitinase  
423 mRNA Levels in Human and Mouse Tissues by Real-Time PCR: Species-Specific Expression of  
424 Acidic Mammalian Chitinase in Stomach Tissues. *PLoS ONE* 8: e67399.
- 425 Olsen, R. E., J. Suontama, E. Langmyhr, H. Mundheim, E. Ringo *et al.*, 2006 The replacement of fish  
426 meal with Antarctic krill, *Euphausia superba* in diets for Atlantic salmon, *Salmo salar*. *Aquac. Nutr.*  
427 12: 280–290.
- 428 Pohls, P., L. González-Dávalos, O. Mora, A. Shimada, A. Varela-Echavarría *et al.*, 2016 A complete  
429 chitinolytic system in the atherinopsid pike silverside *Chirostoma estor*: gene expression and  
430 activities. *J. Fish Biol.* 88: 2130–2143.
- 431 Renna, M., A. Schiavone, F. Gai, S. Dabbou, C. Lussiana *et al.*, 2017 Evaluation of the suitability of a  
432 partially defatted black soldier fly (*Hermetia illucens* L.) larvae meal as ingredient for rainbow trout  
433 (*Oncorhynchus mykiss* Walbaum) diets. *J. Anim. Sci. Biotechnol.* 8: 57.
- 434 Ritchie, M. E., B. Phipson, D. Wu, Y. Hu, C. W. Law *et al.*, 2015 limma powers differential  
435 expression analyses for RNA-sequencing and microarray studies. *Nucleic Acids Res.* 43: e47.
- 436 Robinson, M. D., D. J. McCarthy, and G. K. Smyth, 2010 edgeR: a Bioconductor package for  
437 differential expression analysis of digital gene expression data. *Bioinformatics* 26: 139–140.
- 438 Robinson, M. D., and A. Oshlack, 2010 A scaling normalization method for differential expression  
439 analysis of RNA-seq data. *Genome Biol.* 11: R25.
- 440 Rudi, K., I. L. Angell, P. B. Pope, J. O. Vik, S. R. Sandve *et al.*, 2018 Stable Core Gut Microbiota  
441 across the Freshwater-to-Saltwater Transition for Farmed Atlantic Salmon. *Appl. Environ.*  
442 *Microbiol.* 84:.
- 443 Ryczko, M. C., J. Pawling, R. Chen, A. M. Abdel Rahman, K. Yau *et al.*, 2016 Metabolic  
444 Reprogramming by Hexosamine Biosynthetic and Golgi N-Glycan Branching Pathways. *Sci. Rep.*  
445 6: 23043.
- 446 Secci, G., F. Bovera, S. Nizza, N. Baronti, L. Gasco *et al.*, 2018 Quality of eggs from Lohmann  
447 Brown Classic laying hens fed black soldier fly meal as substitute for soya bean. *Animal* 12: 2191–  
448 2197.
- 449 Tang, W. J., J. Fernandez, J. J. Sohn, and C. T. Amemiya, 2015 Chitin is endogenously produced in  
450 vertebrates. *Curr. Biol.* 25: 897–900.

- 451 Teng, Z., C. Sun, S. Liu, H. Wang, and S. Zhang, 2014 Functional characterization of chitinase-3  
452 reveals involvement of chitinases in early embryo immunity in zebrafish. *Dev. Comp. Immunol.*  
453 46: 489–498.
- 454 Wang, D., A. Li, H. Han, T. Liu, and Q. Yang, 2018 A potent chitinase from *Bacillus subtilis* for the  
455 efficient bioconversion of chitin-containing wastes. *Int. J. Biol. Macromol.* 116: 863–868.
- 456 Yu, Y., C. Lee, J. Kim, and S. Hwang, 2005 Group-specific primer and probe sets to detect  
457 methanogenic communities using quantitative real-time polymerase chain reaction. *Biotechnol.*  
458 *Bioeng.* 89: 670–679.
- 459 Zhang, Y., S. Feng, J. Chen, C. Qin, H. Lin *et al.*, 2012 Stimulatory effects of chitinase on growth and  
460 immune defense of orange-spotted grouper (*Epinephelus coioides*). *Fish Shellfish Immunol.* 32:  
461 844–854.
